# Supplementary material for: AAV Gene Therapy for MPS1-associated Corneal Blindness
Source: PubMed Central journal article supplement (PMC4761992; doi:10.1038/srep22131), 2016-02-22
Supplement: srep22131-s1.pdf [file srep22131-s1.pdf]

## **Supplementary Information**

### **AAV Gene Therapy for MPS1-associated Corneal Blindness**

Melisa Vance\*<sup>1</sup> , Telmo Llanga\*<sup>1, 2</sup> , Will Bennett<sup>1, 2</sup> , Kenton Woodard<sup>1</sup> , Giridhar Murlidharan<sup>1, 3</sup> , Neil Chungfat<sup>2</sup> , Aravind Asokan<sup>1,3</sup> , Brian Gilger<sup>5</sup> , Joanne Kurtzberg<sup>6</sup> , R. Jude Samulski<sup>1, 4</sup> , Matthew L Hirsch<sup>1, 2</sup> .

<sup>1</sup>Gene Therapy Center, University of North Carolina at Chapel Hill, NC, 27599

<sup>2</sup>Department of Ophthalmology, University of North Carolina, Chapel Hill, NC, 27599

<sup>3</sup>Department of Genetics, University of North Carolina, Chapel Hill, NC, 27599

<sup>4</sup>Department of Pharmacology, University of North Carolina, Chapel Hill, NC, 27599

<sup>5</sup>College of Veterinary Medicine, NCSU-CVM, Clinical Sciences, Raleigh, NC, USA

<sup>6</sup>Department of Pediatrics, Duke University, Durham, NC, 27710

A. 293 Cells

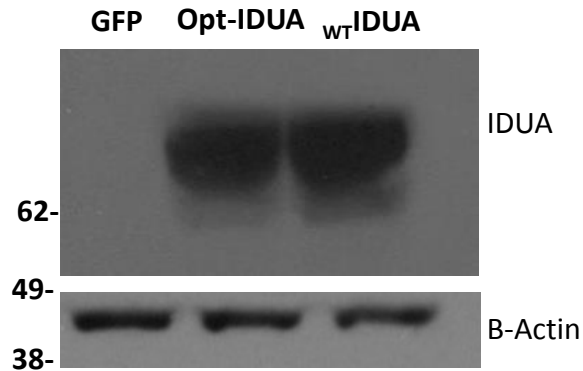

B. MPS1 Cells

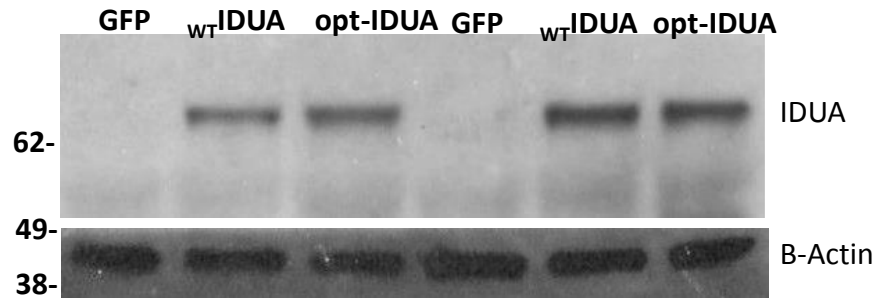

**Figure S1. Evaluation of Optimized IDUA.** 293 cells (A) or MPS1 human fibroblasts (B) were transfected with identical expression cassettes containing the wild type ( $_{WT}$ IDUA) or codon-optimized (opt-IDUA) IDUA open reading frames. Three days post-transfection Western blot analysis was used to determine the overall abundance of IDUA and B-actin. The sizes of a molecular weight marker is listed in kiloDaltons on the left.

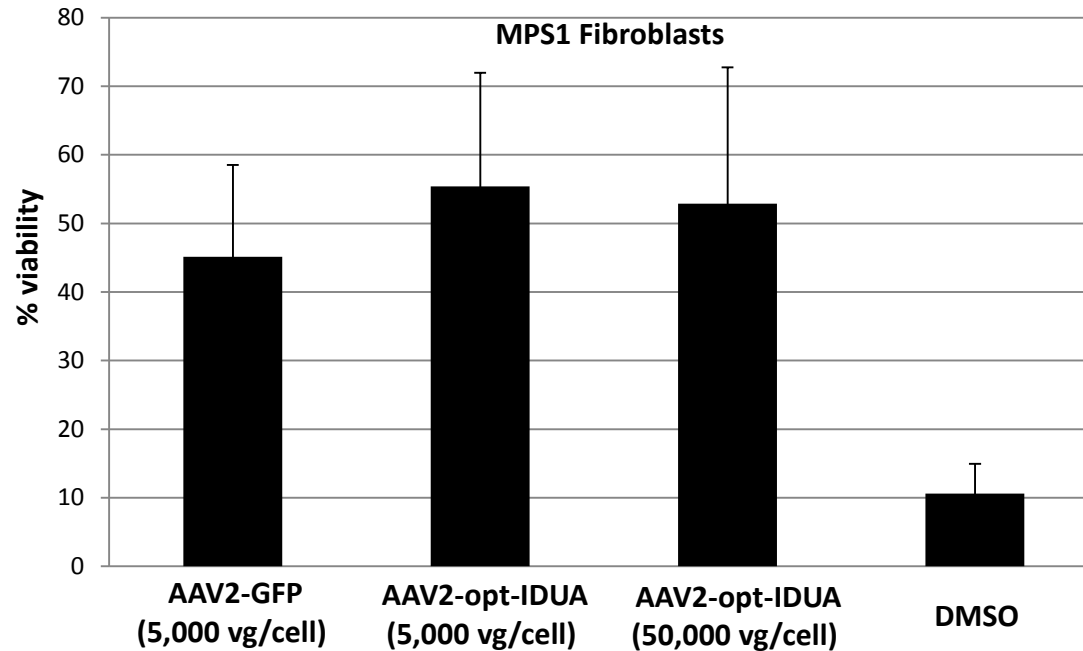

**Figure S2. Analysis of AAV2-optIDUA toxicity in MPS1 patient fibroblasts.**

Trypan blue dye exclusion assay was performed on patient fibroblast cells following infection with AAV2 vector carrying opt-IDUA sequence or GFP reporter gene. Incubation with DMSO was used as a cell death control. Vg, viral genomes.

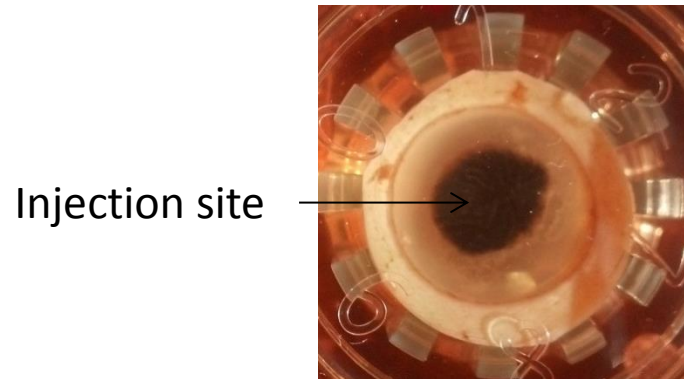

**Figure S3. Intrastromal injection.** Representative image demonstrating the dye distribution following an intrastromal vector injection in a cornea explant. India ink was used in a vector prep with a final volume of 50  $\mu$ l for each injection.
